# Supplementary material for: A BEAF dependent chromatin domain boundary separates myoglianin and eyeless genes of Drosophila melanogaster
Source: PubMed Central journal article supplement — Nucleic Acids Res. 2011 Jan 18;39(9):3543–57. doi: 10.1093/nar/gkq1297 (PMC3089456; doi:10.1093/nar/gkq1297), 2011-01-18
Supplement: supp_gkq1297_Supplementary_Figures.pdf [file supp_gkq1297_Supplementary_Figures.pdf]

## Sequence feature of the ME region

```

aaagcagctgatcagatgcatcgatcgatcacggtcaccggcaatttcggttttagttggcataacaggc
cgcttttaaaaatgtatctgctgaaacgcattgcAAGAGtaaactttaattcatattaacattttTATCGa
gcaaaatagcattatattaaaatgaaatatttattgaatatactcctactttttttttacaattctagaa
aacattttattttatatttccactgtcgctaataatcactttctattgtaaatacaatttaataccttaagccg
ttttaaCTCTTataagttatgagtgtagacatttttacatttcaaagatttcaaataagaccgaagaaact
atataagatatatttttatttagcaggatttgatttgTCTCTataatgttgggtccctagttgtttttttt
attacacaaaattgagtgctattatacaacaaaaattacatgcgtattaatgttactactggaatgacta
tattgatacaaaaggaatttttaaaatttaaccgaagttccgcattcttgtcctaacatttcgtgttttaaa
ttaacggcaaaaatgtcgttactctggaattaataaaaagtacccaacgcacttacataagtatgcaaaaa
taattttatgtgtataaaagaaacttatattaaatcaagtacataattcgtgcgggtcccctttgttccgca
gtcttcttatataattattgcccattaatatggttggtgtaagaaggcaatctgggaactccataaaaaggg
tagggacaattaccgcgatgtctagtgttttccagattagctgtCGATATATCGacgcccgtacagatgtt
taagcctttccacacatacatttatgagtttccTATCGATAtggaagaaaaCGATAggtgttcacactgta
ctaacttatttttatttgctttgtatcagcaattctgttgttttacttaagaatagcaattcaaataGAGAA
gacttcttttatgtatcaacaaagtaactgatAAGAGAttatttattggatggattgtaagctacttattt
tttccattgtggttaacaatttacgatttttttttgggttataataaagatttaataaaaataatttcaaca
agtgcgtcaattttccttcatctacgcacatatagatggtaatcgtgCGATAaacctaataattacgaaaat
ggcgatcacgcattcaacCGATAaatacagaactaaaatacttctctgatcaaaaacaagaatttataattt
tttttctattatttccactacgttgcaattttctgaagaaatcactatacgctctgcaatgggttaacaa
taggaaacgctttagttggctttcaaataattttcacacattttcaacgagtagattagttgaactatta
atagctcattaatggaccgattcttttaggtctgctaaattatcattcttatatctgtgaatttatttttt
actgcatcgaatttttgaaaataacgtatTCTCTacgcaatcactggatttgggttgccaTATCGatttct
atatatgttAAGAGttgcccgtttgtatttttacacgccGAGAGttgccatcctgatacgagcagatgcgtg
ctg

```

Sequence of ME region showing different motifs and primers used in this study. BEAF and GAF binding motifs are shown in red and blue caps, respectively. The primer sequences used for cloning the 1583 bp part of ME region in pRW+ and YW assay vectors are marked by green arrows. The primers used for cloning the 917 bp underlined part of ME region in pCfhL assay vector are marked by purple arrows. All the five BEAF sites indicated in this 917 bp region were mutated to assess the role of BEAF in ME boundary. The primers used for quantitative Real Time PCR of ChIP analysis for anti-FLAG (for BEAF) and anti GAF antibodies are shown as red and blue arrows, respectively. Primers shown here and additional primers used in ChIP experiments are listed in Supplementary Table 4.

## Enhancer blocker assay in wing

(a)

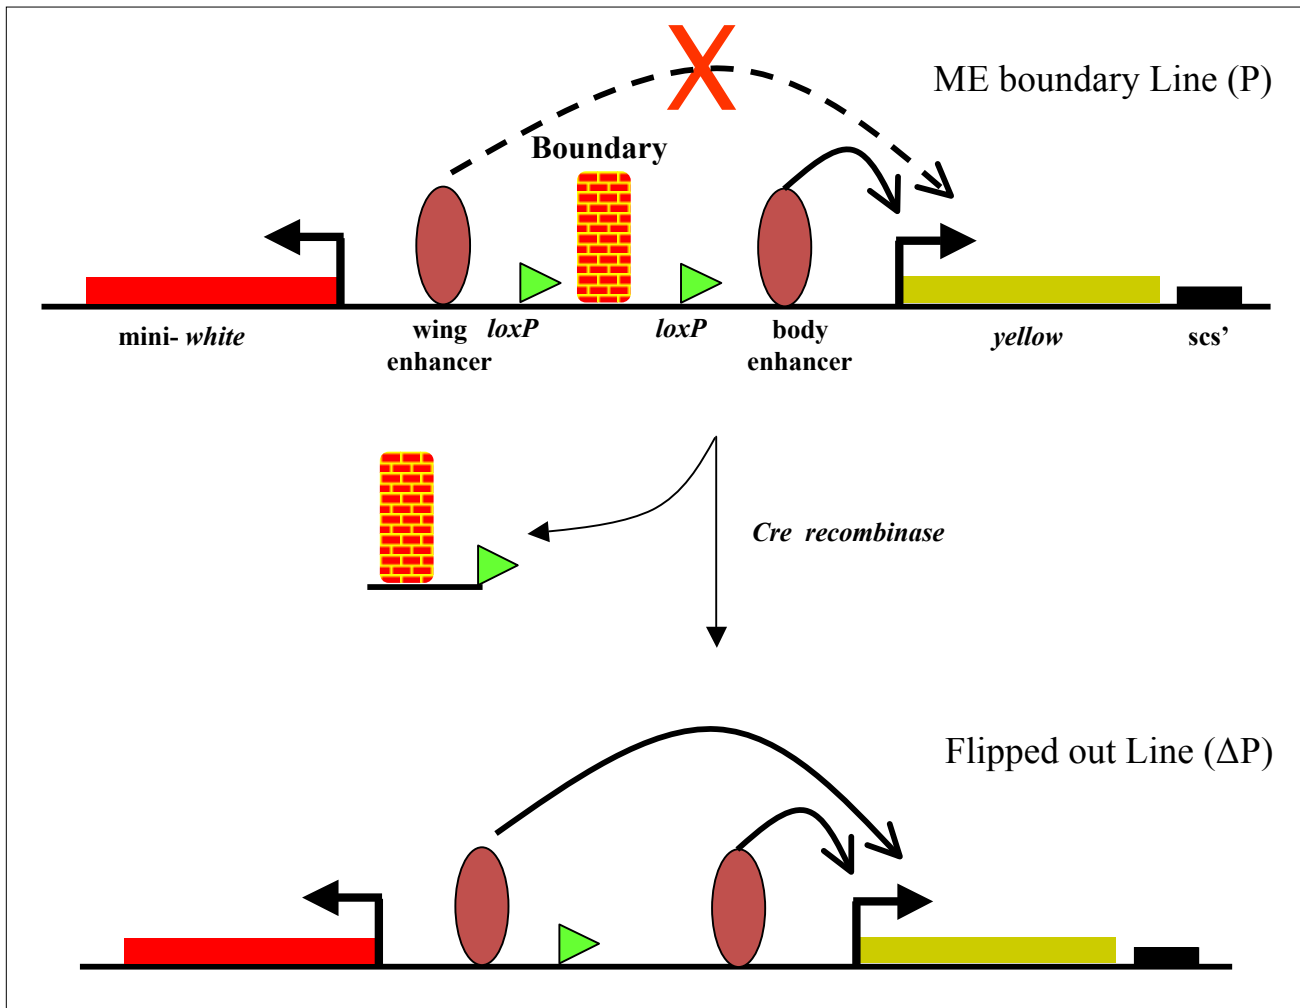

Schematic representation of the YW vector. The test fragment is inserted between the wing enhancer and *yellow* gene to assess if such a insert blocks access of this enhancer to the gene, shown as red cross on the broken arrow. The body enhancer is free to act on the *yellow* gene. The test fragment is flanked on both sides with *loxP* sites. On crossing the transgenic lines with *Cre* expressing line the test fragment can be flipped out and the wing enhancer can now act on the *yellow* gene. *mini-white* is to score for the transgene.

## Supplementary Figure 2

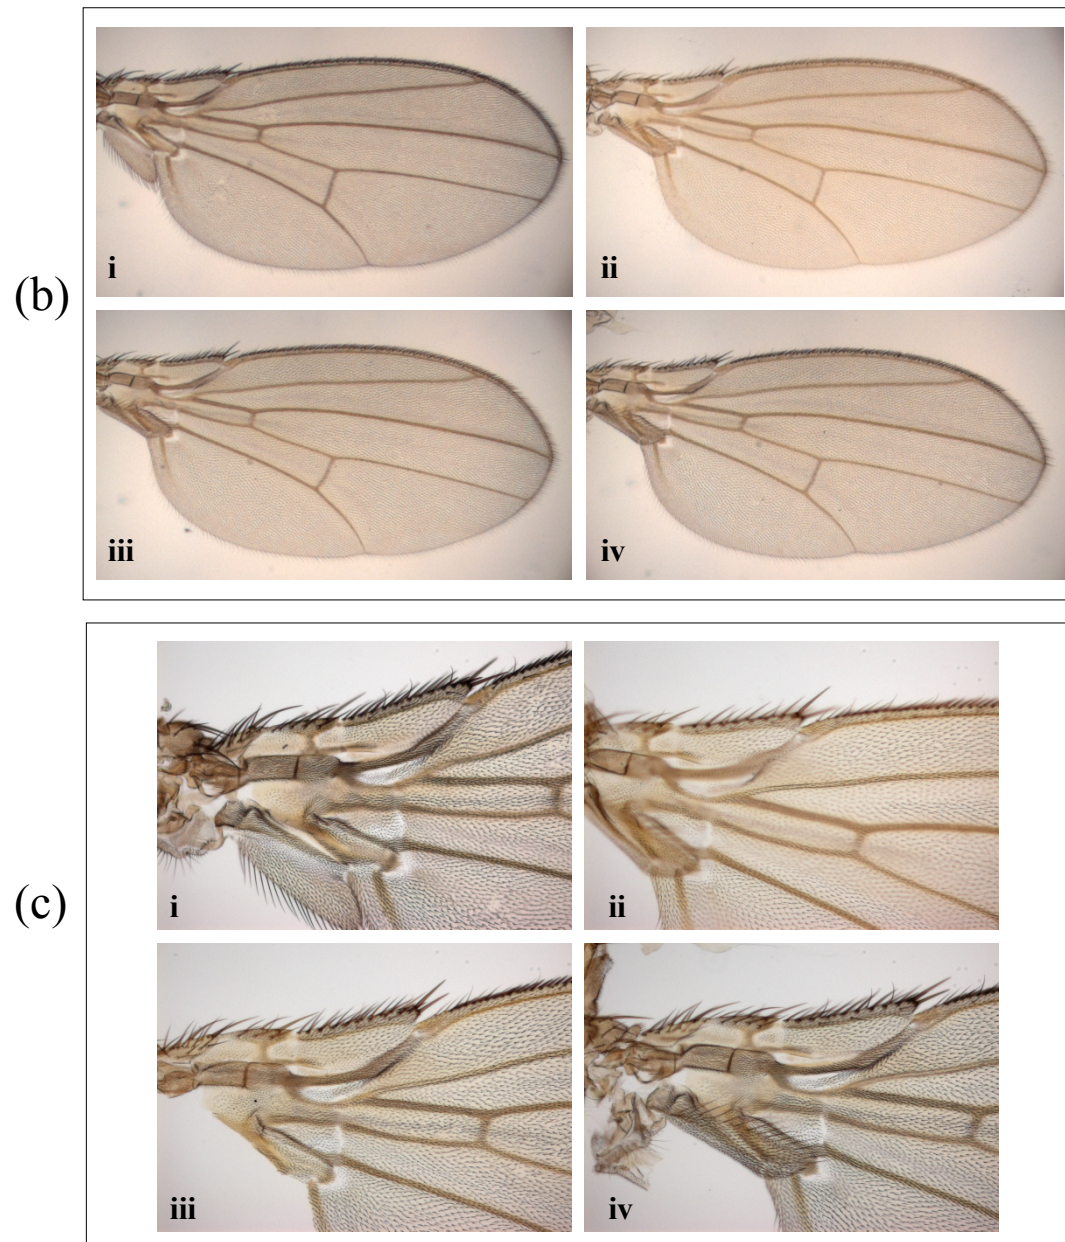

ME region acts as an enhancer blocker in the wing. Whole wing (b) and enlarged hinge part of the wing (c) from different genotypes are shown. i is from wild type *CS* fly, ii is from *yw<sup>1118</sup>* fly in which the *yellow* gene is mutated, iii is from a line carrying ME region and iv is from the same line after ME region is flipped out. All the wings shown are heterozygous for the transgene.

Supplementary Figure 2

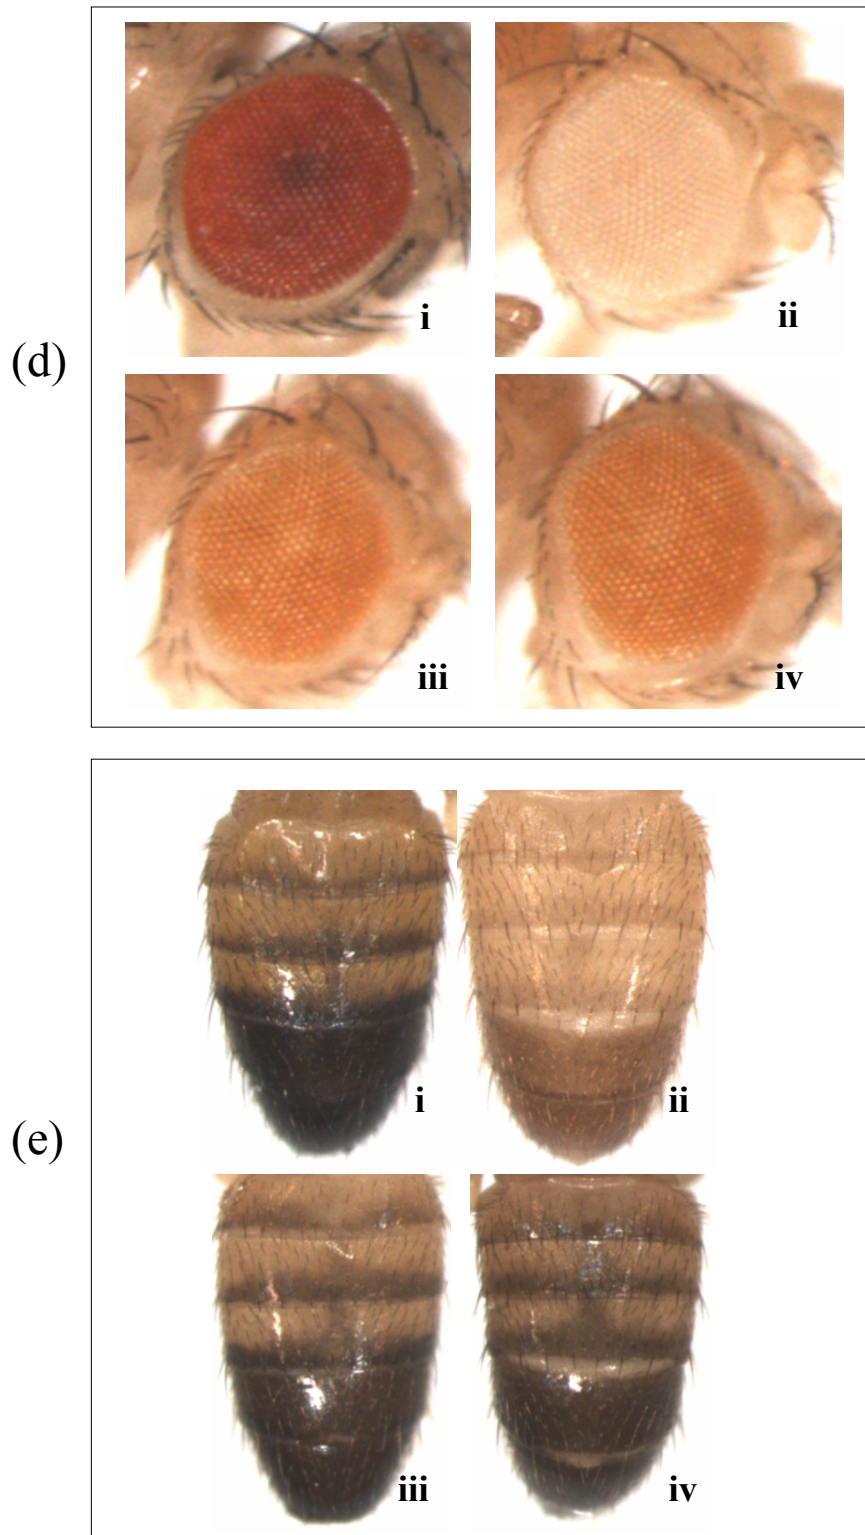

ME region acts as a boundary element and not a repressor element. Eye (d) and body (e) pigmentation levels in different genotypes are shown. i is from wild type CS fly, ii is from  $yw^{1118}$  fly in which the *yellow* gene is mutated, iii is from a line carrying ME region and iv is from the same line after ME region is flipped out. All the wings shown are heterozygous for the transgene.

Map of the region containing *myoglianin* and *eyeless* genes

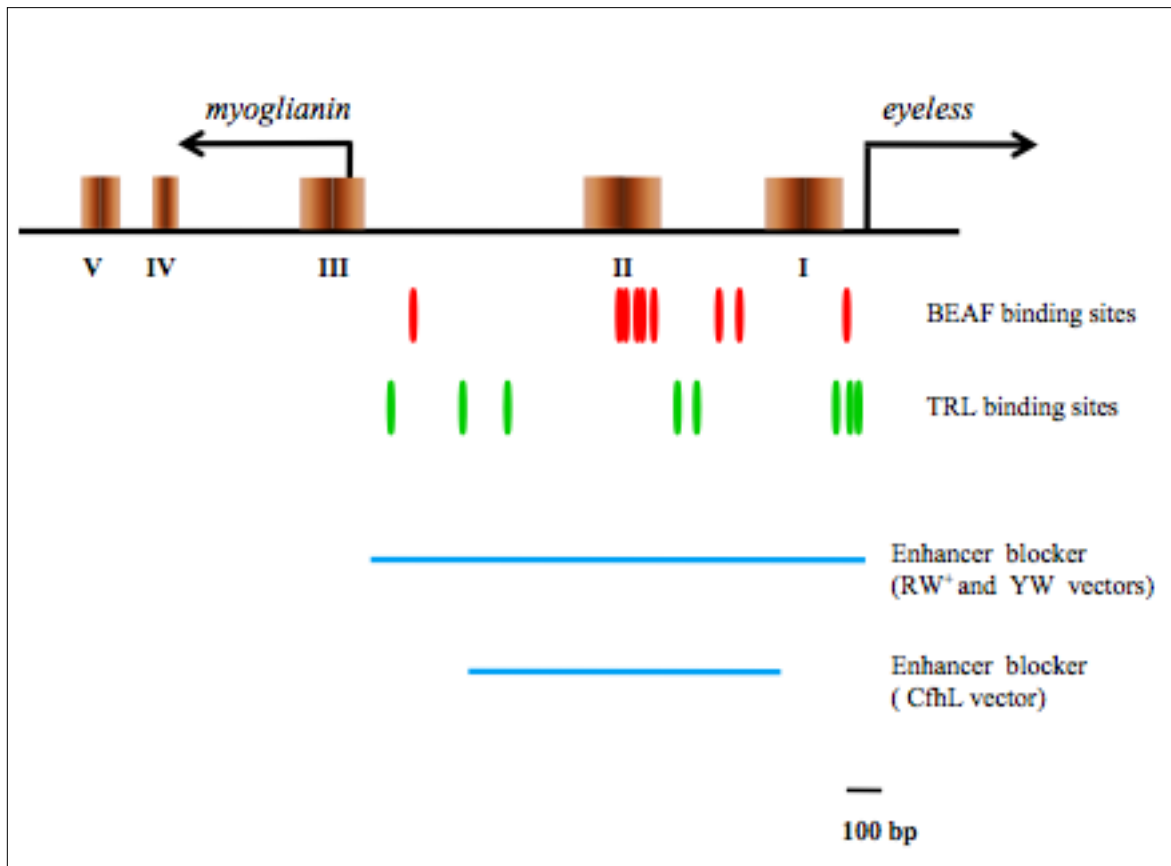

The five DNaseI hypersensitive sites I-V are shown as brown boxes. Red ovals indicate BEAF binding sites and green ovals indicate TRL/GAF binding sites. Blue bars indicate the fragments used for boundary assay in different vectors.

**ME acts as an enhancer blocker in the embryos**

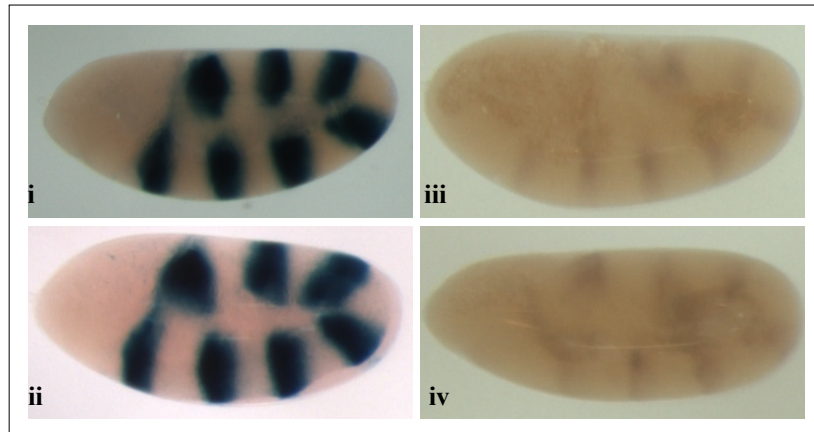

Upper left embryo (i) is from a control line carrying only the vector. Lower left embryo (ii) is from a control line carrying 1 kb  $\lambda$  DNA in place of test fragment. Upper right embryo (iii) is from a line carrying a fragment with five binding sites for the protein Su(Hw). Lower right embryo (iv) is from a line carrying ME sequence. All the embryos shown are homozygous. These results show that while phage control DNA insert has no effect in this assay vector, both ME and *gypsy* derived 0inserts have comparable enhancer blocking boundary activity.

Colocalization of BEAF and GAF on polytene chromosomes of ME lines

(a) Transgenic larvae carrying ME on the third chromosome were dissected. Probe ME is in red and anti BEAF antibody is in green. Overlay shows colocalization of transgene locus with BEAF. Two ME signals show transgenic and endogenous locus on the 4th chromosome.

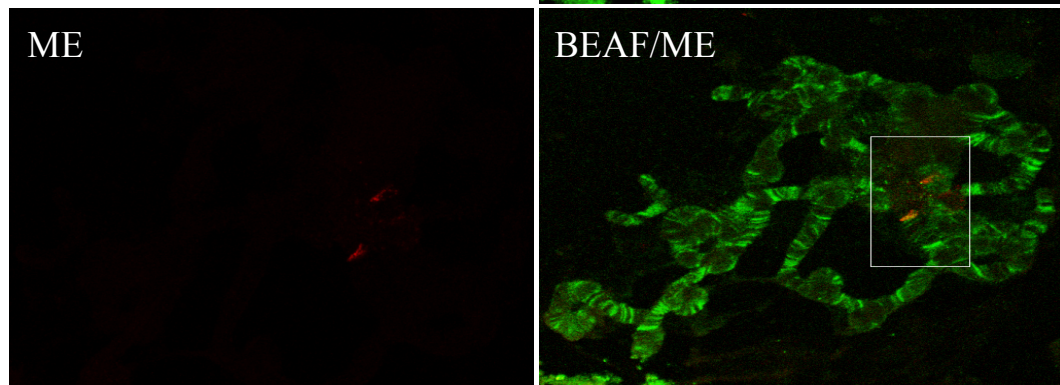

(b) BEAF does not colocalize to the transgene in case of flipped out line. Transgenic larvae carrying flipped out version of the ME line on the third chromosome were dissected. Probe *lacZ* is in red and anti BEAF antibody is in green.

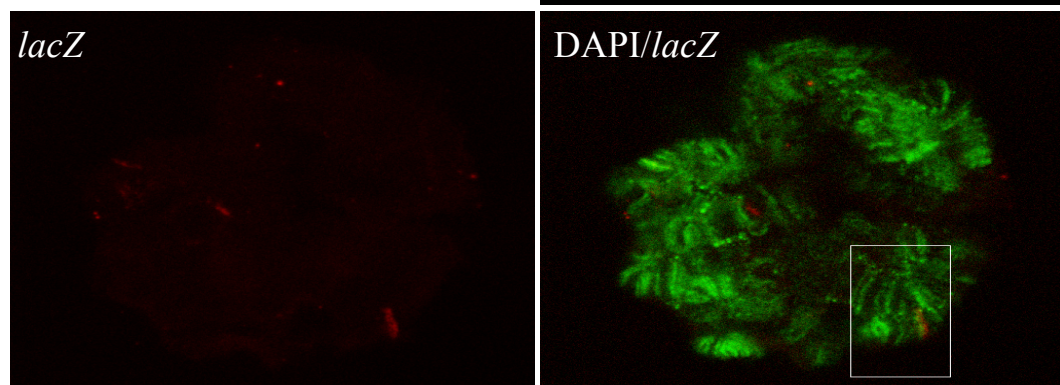

(C) Colocalisation of GAF and ME on polytene chromosomes. Transgenic larvae carrying ME on the third chromosome were dissected. Probe *lacZ* is in red, BEAF is in green and DAPI is in blue.

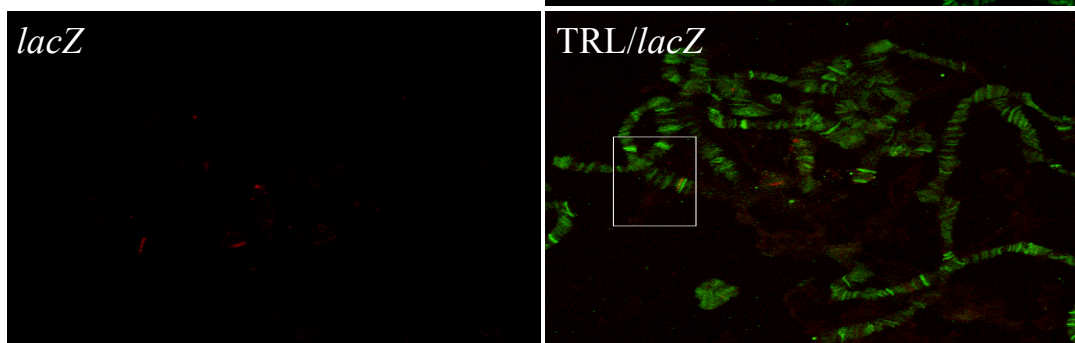

(d) GAF does not colocalize with the transgene in case of flipped out line. Transgenic larvae carrying ME on the third chromosome were dissected. Probe *lacZ* is in red, BEAF is in green and DAPI is in blue.

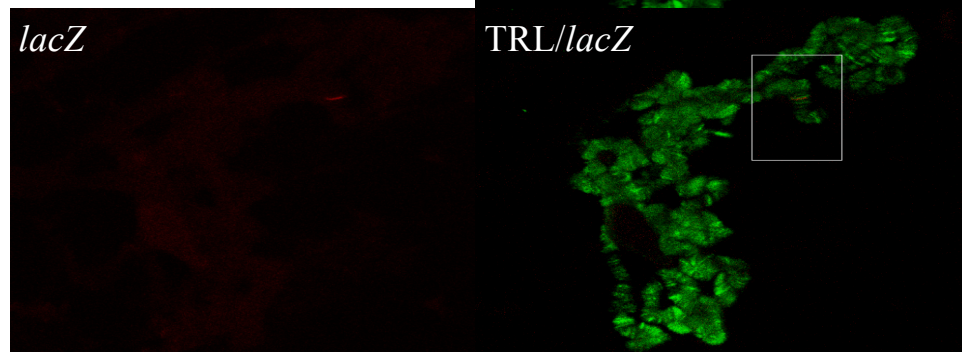

***BEAF* but not *Dref* has effect on ME boundary function**

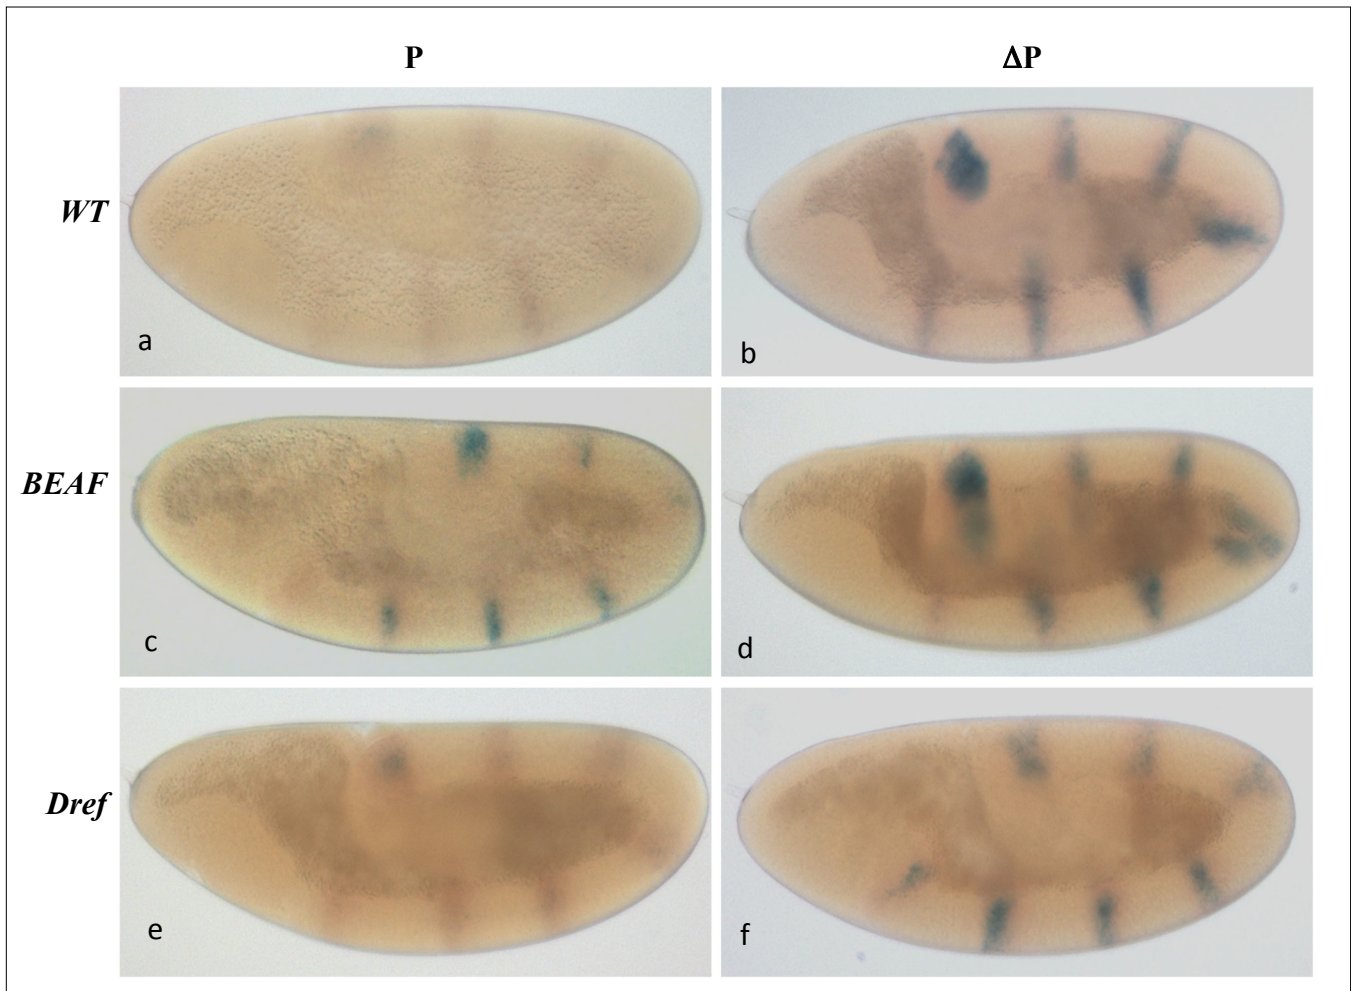

*lacZ* staining of embryos carrying ME(P) (a) and flipped out ( $\Delta$ P) (b) of the same line. Embryos in *BEAF*<sup>ABKO</sup> mutant background carrying ME (c) and flipped out (d). Embryos in *Dref*<sup>KG09294</sup> mutant background carrying ME (e) and flipped out (f). All embryos are heterozygous for ME (P), flipped out ME ( $\Delta$ P), *BEAF* and *Dref*. While in *BEAF* mutant background (c) *lacZ* staining is enhanced indicating the weakening of boundary function, no such effect is seen in *Dref* mutant background (e) suggesting that the latter has no contribution to the ME boundary activity.

## Effect of *Trl*, *CTCF*, *CP190* and *psq* mutations on ME boundary

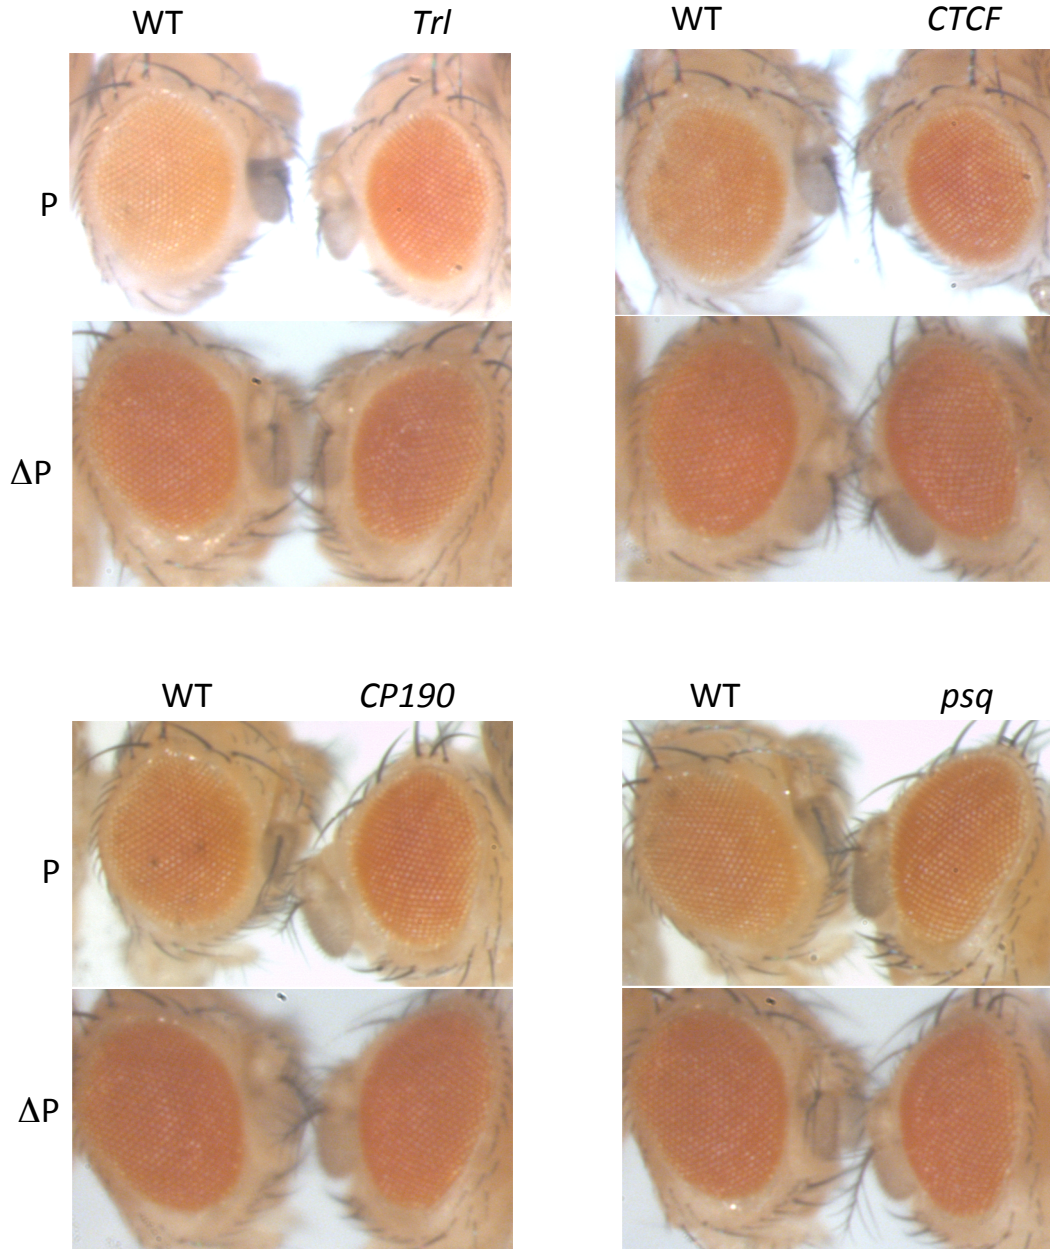

Eye color comparison of transgenic flies carrying ME in different mutation backgrounds are shown. Each panel has eye (WT) of initial ME (P) or flipped out ME( $\Delta$ P) line and next to it is the eye from the same line in indicated mutant background - *Trl*<sup>13C</sup>, *CTCF*<sup>Y+6</sup>, *CP190*<sup>H4-1</sup> and *psq*<sup>D91</sup>. While *Trl*<sup>13C</sup> has clear effect on the enhancer blocking activity of ME, other mutations do not have any noticeable effect.

## Effect of PcG and trxG mutations on ME boundary

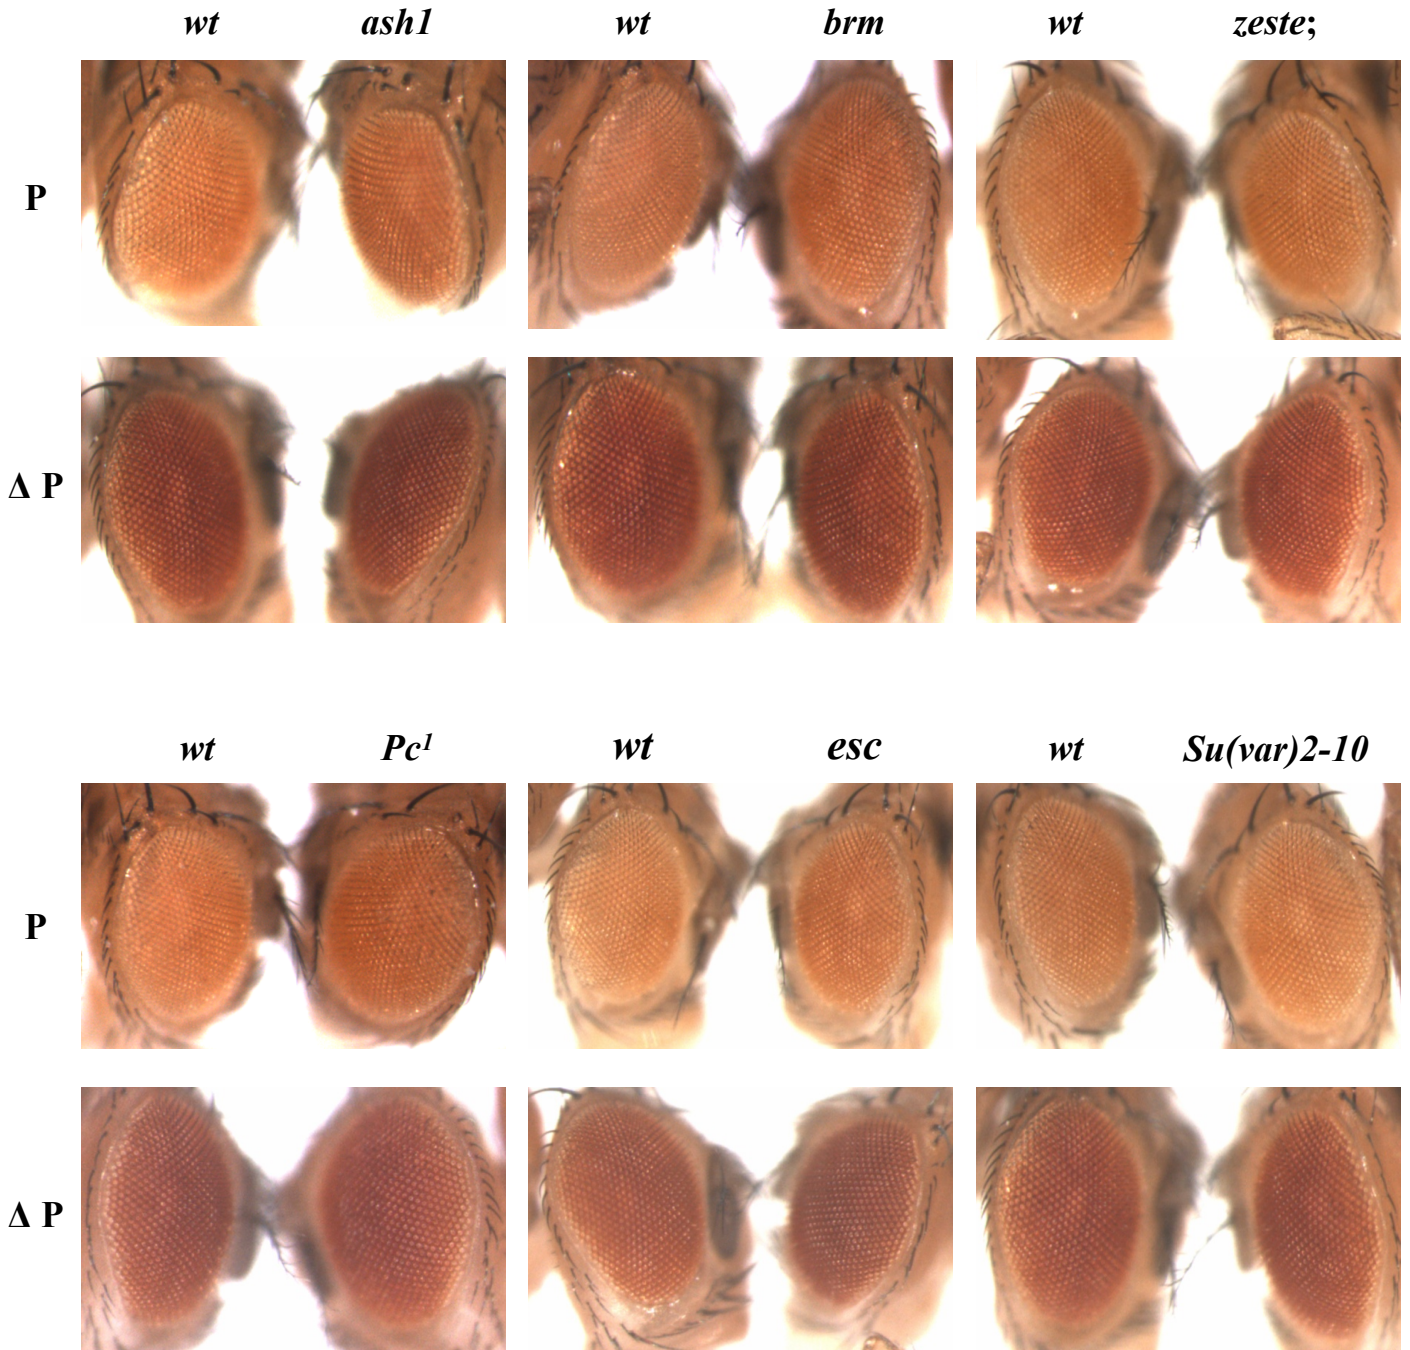

Eye color comparison of transgenic flies carrying ME in different mutation backgrounds are shown. Each panel has eye (WT) of initial ME (P) or flipped out ME(ΔP) line and next to it is the eye from the same line in indicated mutant background - *ash1<sup>B1</sup>*, *brm<sup>2</sup>*, *z<sup>1</sup>*, *Pc<sup>1</sup>*, *esc<sup>2</sup>* and *Su(var)2-10<sup>2</sup>*. Except for *z<sup>1</sup>* and *Su(var)2-10<sup>2</sup>* all other tested mutants show varying degree of effect on the enhancer blocking activity of ME.

## BEAF does not bind to the mutated ME region

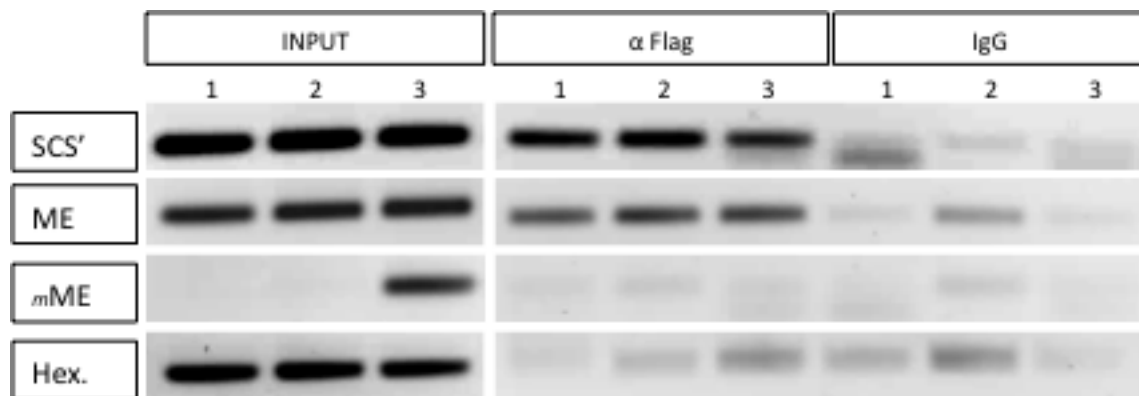

Chip performed with larvae expressing flag- BEAF protein in wild type (1), transgene carrying ME (2) and transgene carrying mutated ME (3) using anti-Flag antibody. ME regions (endogenous and transgene), mutated ME region only (*mME*), SCS' region (positive control), and HexokinaseC promoter region (negative control) enrichment of was assessed. Equal amount of immunoprecipitated DNA was used for PCR and analyzed on 2% agarose gel. Input chromatin (INPUT) used as PCR controls and IgG pull down as antibody negative control are shown.

Mutated ME is amplified by unique primer pair specific to it, as confirmed by lack of amplification in (1) and (2) INPUT samples. No binding of BEAF to mutated ME region is seen.

**Supplementary Table 1. List of selected intergenic regions**

| S. No. | Intergene | Direction of Transcription | Intergene Size (bp) |
|--------|-----------|----------------------------|---------------------|
| 1      | 1ig2      | ← →                        | 863                 |
| 2      | 8ig9      | ← →                        | 2093                |
| 3      | 9ig10     | → ←                        | 7585                |
| 4      | 12ig13    | → ←                        | 1160                |
| 5      | 19ig20    | → ←                        | 298                 |
| 6      | 23ig24    | ← →                        | 1616                |
| 7      | 24ig25    | → ←                        | 624                 |
| 8      | 27ig28    | ← →                        | 1280                |
| 9      | 28ig29    | → ←                        | 650                 |
| 10     | 30ig31    | ← →                        | 1587                |
| 11     | 31ig32    | → ←                        | 5942                |
| 12     | 35ig36    | ← →                        | 168                 |
| 13     | 36ig37    | → ←                        | 2352                |
| 14     | 37ig38    | ← →                        | 963                 |
| 15     | 42ig43    | → ←                        | 2288                |
| 16     | 43ig44    | ← →                        | 3663                |
| 17     | 44ig45    | → ←                        | 1488                |
| 18     | 49ig50    | ← →                        | 1640                |
| 19     | 50ig51    | → →                        | 3243                |
| 20     | 51ig52    | → ←                        | 2360                |
| 21     | 53ig54    | → ←                        | 1356                |
| 22     | 66ig67    | ← ←                        | 350                 |
| 23     | 67ig68    | ← →                        | 154                 |
| 24     | 68ig69    | → ←                        | 1106                |
| 25     | 71ig72    | → ←                        | 1116                |
| 26     | 73ig74    | → ←                        | 1861                |
| 27     | 74ig75    | ← →                        | 776                 |
| 28     | 76ig77    | → ←                        | 752                 |

Regions narrowed down for potential boundary after analysis of features associated with them. The intergenic region 49ig50 was used for detail functional analysis.

**Supplementary Table 2. List of transgenic lines**

***I. Full length ME (1.5 Kb)***

| <b>S. No.</b> | <b>Line</b> | <b>Vector</b> | <b>Chromosome</b> | <b>Remarks</b> | <b>Flipped out version</b> |
|---------------|-------------|---------------|-------------------|----------------|----------------------------|
| 1             | 137.16.1.1  | RW+           | III               | Blocker (S)    | Δ 137.16.1.1               |
| 2             | 137.16.3.3  | RW+           | III               | Non-blocker    | -                          |
| 3             | 137.19.1.2  | RW+           | II                | Non-blocker    | -                          |
| 4             | 137.19.5.1  | RW+           | I                 | Blocker        | Δ 137.19.5.1               |
| 5             | 137.21.8.1  | RW+           | III               | Blocker        | -                          |
| 6             | 141         | RW+           | II                | Blocker        | Δ 141                      |
| 7             | 203         | RW+           | II                | Blocker        | -                          |
| 8             | 204         | RW+           | III               | Blocker        | -                          |
| 9             | 310         | RW+           | III               | Blocker        | -                          |
| 10            | 373         | RW+           | III               | Blocker        | Δ 373                      |
| 11            | 110.27.1.1  | YW            | II                | Blocker (W)    | Δ 110.27.1.1               |
| 12            | 110.27.1.3  | YW            | II                | -              | -                          |

***II. Smaller fragment ME (917bp)***

| <b>S. No.</b> | <b>Line</b> | <b>Vector</b> | <b>Chromosome</b> | <b>Remarks</b> | <b>Flipped out version</b> |
|---------------|-------------|---------------|-------------------|----------------|----------------------------|
| 1             | 917.10.1    | Cfhl          | III               | Blocker (M)    | -                          |
| 2             | 917.10.3    | Cfhl          | III               | Blocker (M)    | Δ 917.10.3                 |
| 3             | 917.36.2.2  | Cfhl          | III               | Blocker (W)    | -                          |
| 4             | 917.36.2.5  | Cfhl          | III               | Blocker (S)    | Δ 917.36.2.5               |
| 5             | 917.67.2    | Cfhl          | III               | Blocker (S)    | Δ 917.67.2                 |
| 6             | 917.77.1    | Cfhl          | I                 | Blocker (W)    | Δ 917.77.1                 |
| 7             | 917.80.3.1  | Cfhl          | I                 | Blocker (W)    | Δ 917.80.3.1               |

***III. Mutant version of smaller fragment ME (917 bp)***

| <b>S. No.</b> | <b>Line</b> | <b>Vector</b> | <b>Chromosome</b> | <b>Remarks</b> | <b>Flipped out version</b> |
|---------------|-------------|---------------|-------------------|----------------|----------------------------|
| 1             | S 60.2      | Cfhl          | III               | Non-blocker    | Δ S 60.2                   |
| 2             | S 55.1      | Cfhl          | I                 | Non-blocker    | Δ S 55.1                   |
| 3             | S 155.1     | Cfhl          | I                 | Non-blocker    | Δ S 155.1                  |

M - moderate, W - week, S - strong

**Supplementary Table 3. List of *Drosophila* stocks used in this study.**

| S.No. | Name                          | Mutation                                    | Source                                    |
|-------|-------------------------------|---------------------------------------------|-------------------------------------------|
| 1     | <i>CS</i>                     | <i>Wild type</i>                            | Bloomington # 1                           |
| 2     | <i>white</i>                  | <i>w<sup>1118</sup></i>                     | Bloomington # 3605                        |
| 3     | <i>yellow white</i>           | <i>yw<sup>1118</sup></i>                    | Generated in lab                          |
| 4     | <i>BEAF</i>                   | <i>BEAF<sup>AB-KO</sup></i>                 | Craig Hart                                |
| 5     | <i>Trithoraxlike</i>          | <i>Trl<sup>R85</sup>, Trl<sup>I3C</sup></i> | Francois Karch                            |
| 6     | <i>Polycomb</i>               | <i>Pc<sup>1</sup></i>                       | Francois Karch                            |
| 7     | <i>absent, small homeotic</i> | <i>ash1<sup>B1</sup></i>                    | Bloomington # 5045                        |
| 8     | <i>brahma</i>                 | <i>brm<sup>2</sup></i>                      | Bloomington # 3619                        |
| 9     | <i>extra sex combs</i>        | <i>esc<sup>2</sup></i>                      | Bloomington # 813                         |
| 10    | <i>zeste</i>                  | <i>z<sup>1</sup></i>                        | Bloomington # 200                         |
| 11    | <i>Su(var)2-10</i>            | <i>Su(var)2-10<sup>2</sup></i>              | Bloomington # 6235                        |
| 12    | <i>CCCTC-binding factor</i>   | <i>CTCF<sup>y+6</sup></i>                   | Victor G. Corces                          |
| 13    | <i>CP190</i>                  | <i>CP190<sup>H4-1</sup></i>                 | Victor G. Corces                          |
| 14    | <i>Dref</i>                   | <i>Dref<sup>KG09294</sup></i>               | Victor G. Corces<br>(Bloomington # 15178) |
| 15    | <i>pipsqueak</i>              | <i>psq<sup>D91</sup></i>                    | Bloomington # 8145                        |

**Supplementary Table 4. List of primers used in this study.**

| Amplicon region              | primers | sequence                    |
|------------------------------|---------|-----------------------------|
| ME full length (~1.6kb)      | Forward | acggctcaccggcaatttcg        |
|                              | Reverse | ggatggcaactctcggcgtg        |
| ME short version (917bp)     | Forward | aattttggtccctagttgtttt      |
|                              | Reverse | cagaaaattgcaacgtagtgga      |
| <i>SCS'</i>                  | Forward | acattttctaactacaaagtcacga   |
|                              | Reverse | cgatattgggtaaaacattcacg     |
| <i>iab-7 PRE</i>             | Forward | ggaataccgcactgtcgtagg       |
|                              | Reverse | gcagccatcatggatgtgaa        |
| ME                           | Forward | ggacaattaccgcgatgtct        |
|                              | Reverse | ggacaattaccgcgatgtct        |
| ME1                          | Forward | gctttgtatcagcaattctgttg     |
|                              | Reverse | aaaaataagtagcttacaatccatcca |
| ME2                          | Forward | cgtattctctacgcaatcactgg     |
|                              | Reverse | tatcaggatggcaactctcg        |
| mutated ME                   | Forward | gtgttttccagattagctgtctc     |
|                              | Reverse | cacctcgagttttcttccatc       |
| <i>Ubx</i> intron II         | Forward | catttgaacttgacatttagcac     |
|                              | Reverse | gtcgaggaatgccaaaagtgcac     |
| <i>hexokinase C</i> promoter | Forward | gggaaaacacttgacgttgg        |
|                              | Reverse | ggaggtgcgagaacttatgc        |
